# Supplementary material
Source: Royal Society of Chemistry journal article supplement (doi:10.1039/d5nj04895h)
Supplement: d5nj04895h1.pdf [file d5nj04895h1.pdf]

## Supplementary Information

### **The Dual-functional Nanoplatfom for the Tracking of Formaldehyde and Neuroprotection in Parkinson's Disease**

Liang Zhou<sup>a†</sup>, Xiangzhu Zhai<sup>a,†</sup>, Shiyuan Fan<sup>a</sup>, Zicheng Wang<sup>a</sup>, Sufang Ma<sup>a,b</sup>, Yanhua Cui<sup>c,\*</sup>, Yunfei Bai<sup>d</sup>, Jianfei Liu<sup>a,b</sup>, Chengwu Zhang<sup>a,b,\*</sup> and Wen Liu<sup>a,b,\*</sup>

<sup>a</sup>School of Basic Medical Sciences, Shanxi Medical University, Taiyuan 030001, P. R. China.

<sup>b</sup>Shanxi Province brain degenerative diseases precision diagnosis and treatment engineering research center, Shanxi Medical University, Jinzhong 030606, P. R. China.

<sup>c</sup>The Fifth Clinical Medical School of Shanxi Medical University, Shanxi Provincial People's Hospital, Taiyuan 030012, P.R. China.

<sup>d</sup>The second Clinical Medical School of Shanxi Medical University, Taiyuan 030001, P.R. China

<sup>†</sup>These authors contributed equally to this work.

\*Email addresses: zhongqiu36@163.com (Y. Cui); chengwu\_zhang@sxmu.edu.cn (C. Zhang); liuwen@sxmu.edu.cn (W. Liu)

Fig. S1-Fig. S8 and Table S1

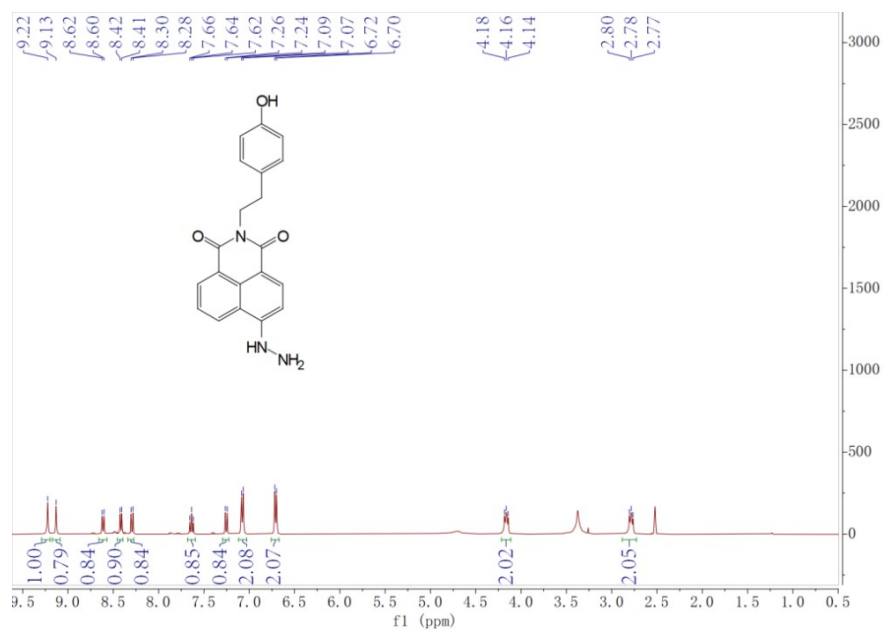

Fig. S1  $^1\text{H}$  NMR of W-2: (400 MHz,  $\text{DMSO-}d_6$ )  $\delta$  9.22 (s, 1H), 9.13 (s, 1H), 8.62 (d,  $J = 8.0$  Hz, 1H), 8.42 (d,  $J = 4.0$  Hz, 1H), 8.30 (d,  $J = 8.0$  Hz, 1H), 7.66 (d,  $J = 8.0$  Hz, 1H), 7.26 (d,  $J = 8.0$  Hz, 1H), 7.09 (d,  $J = 8.0$  Hz, 2H), 6.72 (d,  $J = 8.0$  Hz, 2H), 4.18 (t,  $J = 8.0$  Hz, 2H), 2.05 (t,  $J = 8.0$  Hz, 2H).

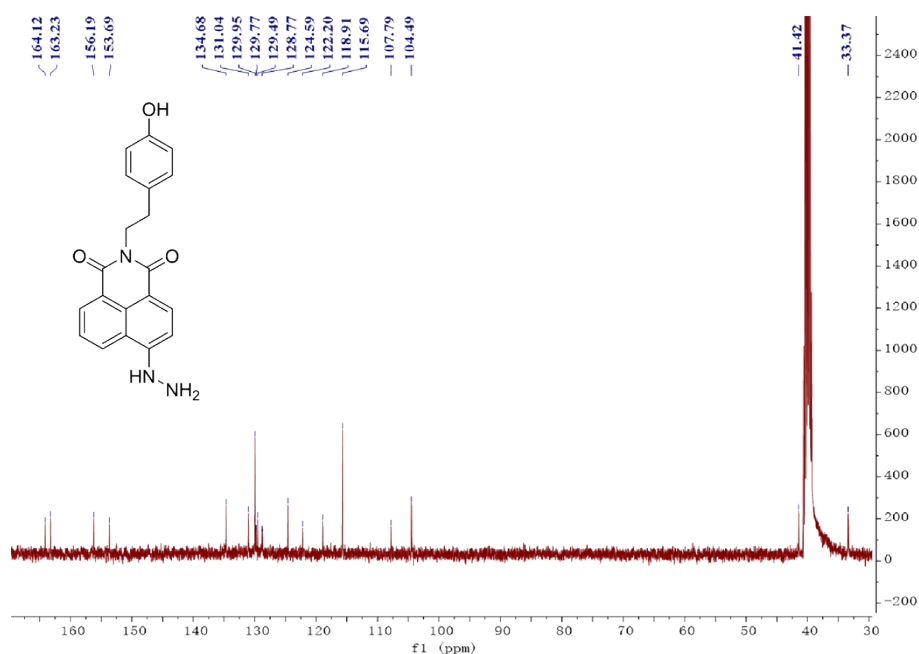

Fig. S2  $^{13}\text{C}$  NMR of W-2: (101 MHz,  $\text{DMSO-}d_6$ )  $\delta$  164.12, 163.23, 156.19, 153.69, 134.68, 131.04, 129.95, 129.77, 128.77, 124.59, 122.20, 118.91, 115.69, 107.79, 104.49, 41.42, 33.37.

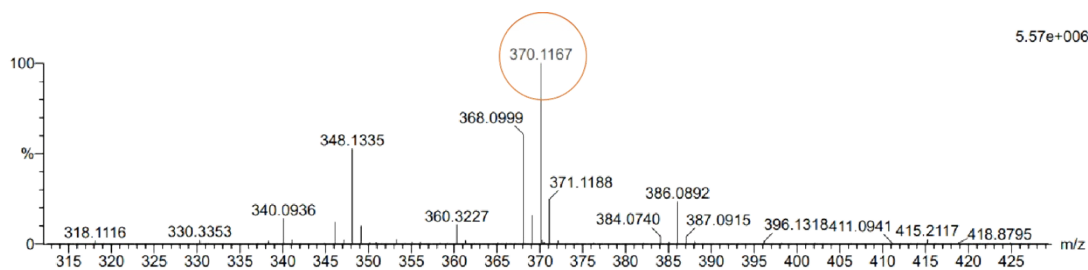

Fig. S3 HR-MS m/z: calcd. for  $[C_{20}H_{17}N_3O_3Na]^+$ : 370.1168, found: 370.1167  $[M+Na]^+$ .

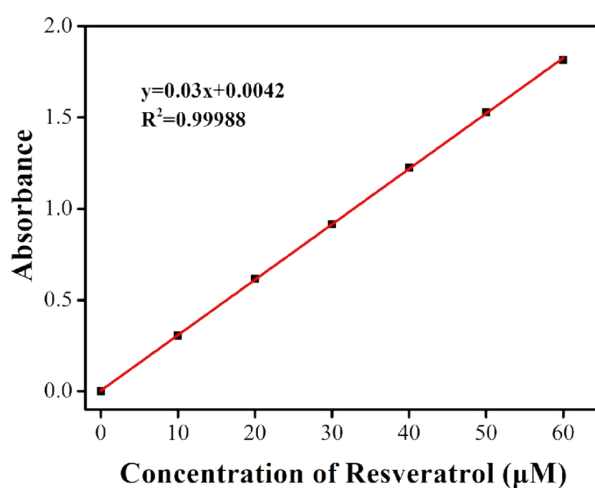

Fig. S4 Standard optical absorbance curve of Res.

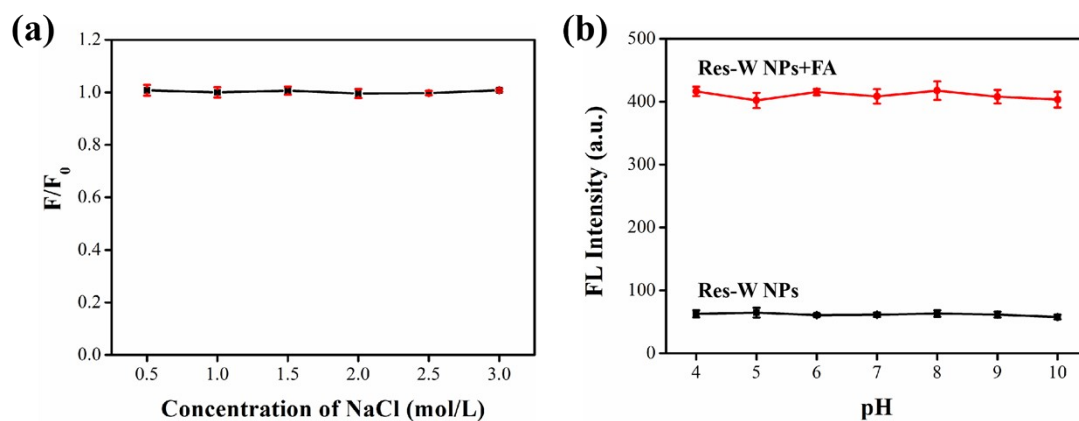

Fig. S5 Optical stability of Res-W NPs. (a) Effect of ionic strength on the optical stability of Res-W NPs. (b) Effect of pH on the optical stability of Res-W NPs.

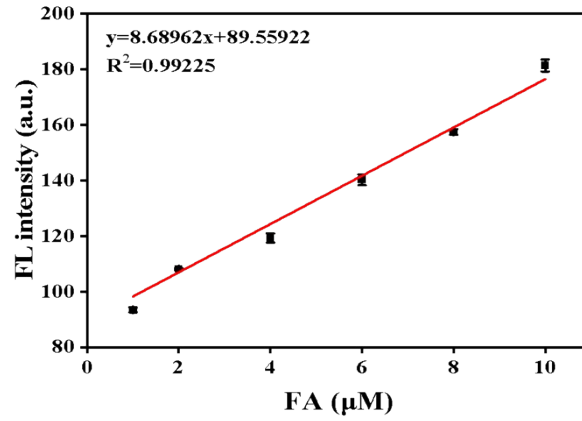

Fig. S6 Linear plot of concentration-fluorescence intensity of Res-W NPs and FA (1.00 -10.00 μmol/L) system.

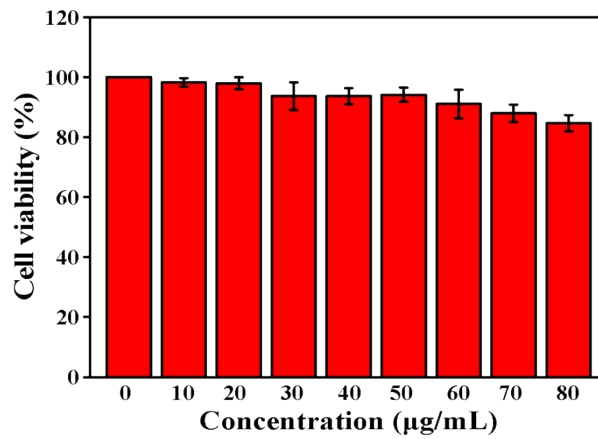

Fig. S7 Toxicity of different concentrations of Res-W NPs to SH-SY5Y cells.

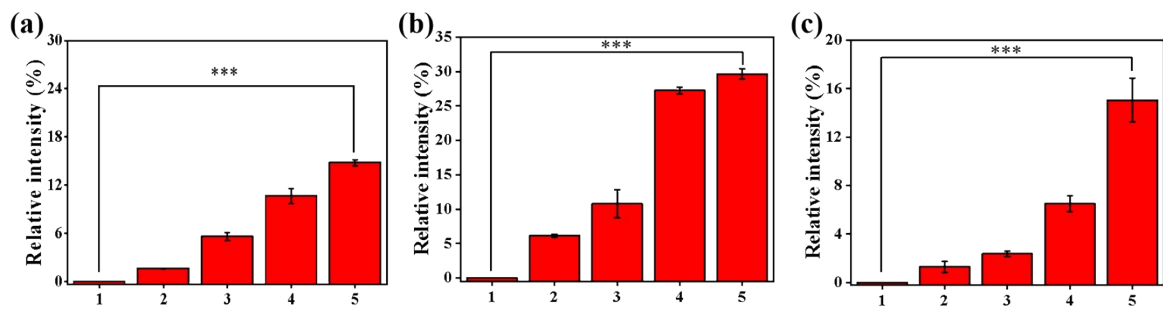

Fig. S8 (a) Quantitative analysis of fluorescence intensity from Fig. 4. (b) Quantitative analysis of fluorescence intensity from Fig. 5a. (c) Quantitative analysis of fluorescence intensity from Fig. 5b. \*\*\*  $p < 0.001$ .

**Table S1** Comparison of the sensing performance of various probes towards FA

| Probe Names              | Imaging Application                             | Detection Limits       | References |
|--------------------------|-------------------------------------------------|------------------------|------------|
| W1a                      | Cells and real food samples                     | 0.91 $\mu\text{mol/L}$ | 1          |
| SWJT-6                   | Cells and zebrafish                             | 5.65 $\mu\text{mol/L}$ | 2          |
| SWJT-10                  | Cells and zebrafish                             | 4.50 $\mu\text{mol/L}$ | 3          |
| U6N-NADH                 | Real samples from environment and food          | 4.50 $\mu\text{mol/L}$ | 4          |
| Probe -NH <sub>2</sub>   | Real food samples and mice                      | 1.87 $\mu\text{mol/L}$ | 5          |
| CH                       | Real food, water samples and zebrafish          | 2.01 $\mu\text{mol/L}$ | 6          |
| Probe -NHNH <sub>2</sub> | Cells, zebrafish and mice                       | 0.68 $\mu\text{mol/L}$ | 7          |
| Res-W NPs                | Cells, tissues, zebrafish and <i>C. elegans</i> | 0.64 $\mu\text{mol/L}$ | This work  |

## References

- 1 X. Wang, Z. Huang, C. Sui, M. Xu, J. Ru and X. Sun, *Microchemical Journal*, 2025, **209**, 112672.
- 2 H. Xu, L. Xu, R. Huai, C. Zhang, S. Suo, Y. Li, Y. Peng and Y. Wanng, *Organic & Biomolecular Chemistry*, 2023, **21**, 6405-6409.
- 3 N. Lin, H. Wu, J. Peng, S. Yang, R. Tan, Y. Peng and Y. Wang, *Organic & Biomolecular Chemistry*, 2023, **21**, 2167-2171.
- 4 M. Li, A. Shen, Y. Hou, X. Hao, M. Du, X. Du, S. Ma, J. Yuan, L. Hou, Y. Zhao, Z. Li and Y. Yang, *Sensors and Actuators B: Chemical*, 2022, **366**, 132007.
- 5 N. Ding, Z. Li, Y. Hao and X. Yang, *Food Chemistry*, 2022, **384**, 132426.
- 6 Y. Liang, Y. Zhang, M. Li, Z. Meng, S. Gong, W. Du, Y. Yang, Z. Wang and S. Wang, *Microchemical Journal*, 2022, **177**, 107305.
- 7 N. Ding, Z. Li, Y. Hao and C. Zhang, *Analytical Chemistry*, 2022, **94**, 12120-12126.
